# Supplementary material for: (3-(4-chlorophenyl)-4,5-dihydroisoxazol-5-yl)methyl Benzene-Sulfonate
Source: Preprints.org preprint supplement (doi:10.20944/preprints202309.0671.v1), 2023-09-11
Supplement: Supplementary file 1 [file supplementary]

## Supplementary Materials

### (3-(4-chlorophenyl)-4,5-dihydroisoxazol-5-yl)methyl benzenesulfonate

Loubna Mokhi <sup>1</sup>, Karim Chkirate <sup>2</sup>, Xiaodong Zhang <sup>3</sup>, Mohsine Driowya <sup>1,4</sup> and Khalid Bougrin <sup>1,5,\*</sup>

<sup>1</sup> *Equipe de Chimie des Plantes et de Synthèse Organique et Bioorganique, URAC23, Faculty of Science, B.P. 1014, Geophysics, Natural Patrimony and Green Chemistry (GEOPAC) Research Center, Mohammed V University in Rabat, Rabat 10010, Morocco*

<sup>2</sup> *Laboratory of Heterocyclic Organic Chemistry URAC 21, Pharmacochimie Competence Center, Av. Ibn Battouta, BP 1014, Faculty of Sciences, Mohammed V University in Rabat, Rabat 10010, Morocco*

<sup>3</sup> *Department of Chemistry, Tulane University, New Orleans, LA 70118, USA*

<sup>4</sup> *Higher School of Technology, Sultan Moulay Slimane University, B.P. 170, Khenifra 54006, Morocco.*

<sup>5</sup> *Chemical & Biochemical Sciences Green-Process Engineering (CBS), Mohammed VI Polytechnic University, Lot 660, Hay Moulay Rachid, Ben Guerir 43150, Morocco*

\* Corresponding author:

Prof. Khalid Bougrin

Email address: [kbougrin@yahoo.fr](mailto:kbougrin@yahoo.fr) or [k.bougrin@um5.ac.ma](mailto:k.bougrin@um5.ac.ma)

## Table of contents

|                                                                         |   |
|-------------------------------------------------------------------------|---|
| 1. $^1\text{H}$ NMR and $^{13}\text{C}$ NMR spectra of compounds 5..... | 3 |
| 2. ESI-MS spectra of compounds 5 .....                                  | 4 |
| 3. FT-IR spectra of compounds 5 .....                                   | 4 |

## 1. Copies of characteristic $^1\text{H}$ NMR and $^{13}\text{C}$ NMR spectra

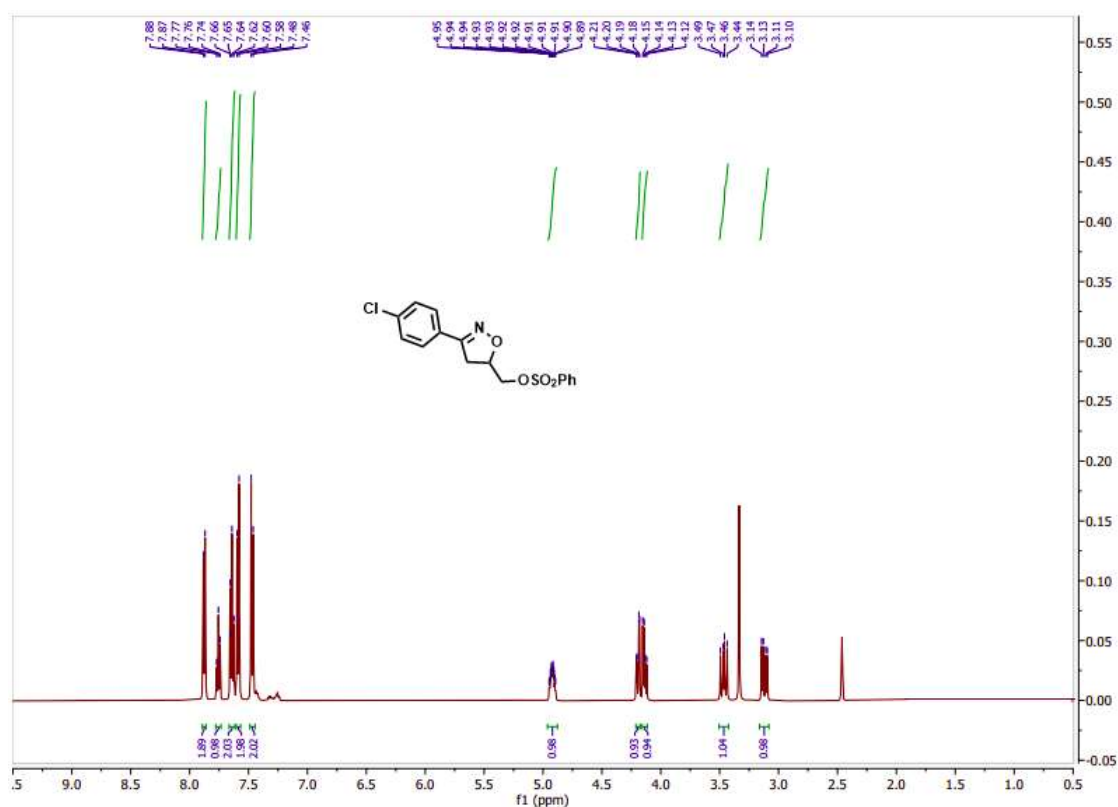

Figure S1.  $^1\text{H}$  NMR spectrum of (5)

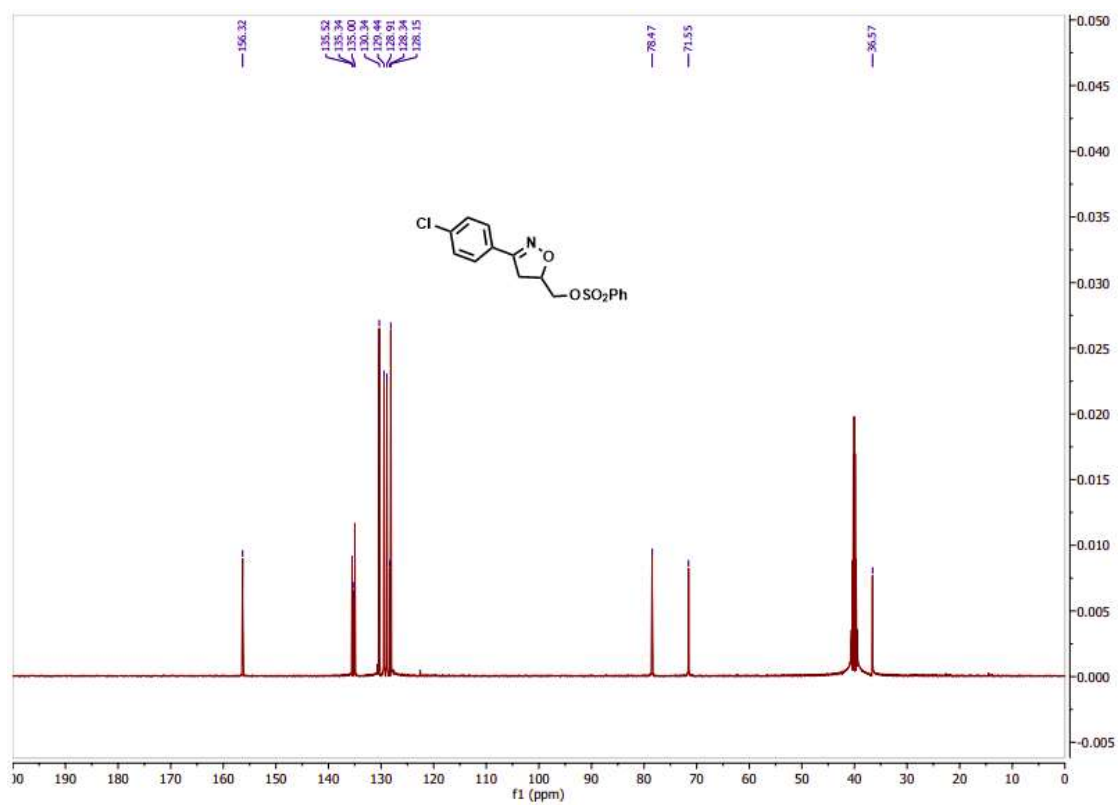

Figure S2.  $^{13}\text{C}$  NMR spectrum of (5)

## 2. Copy of characteristic ESI-MS spectra

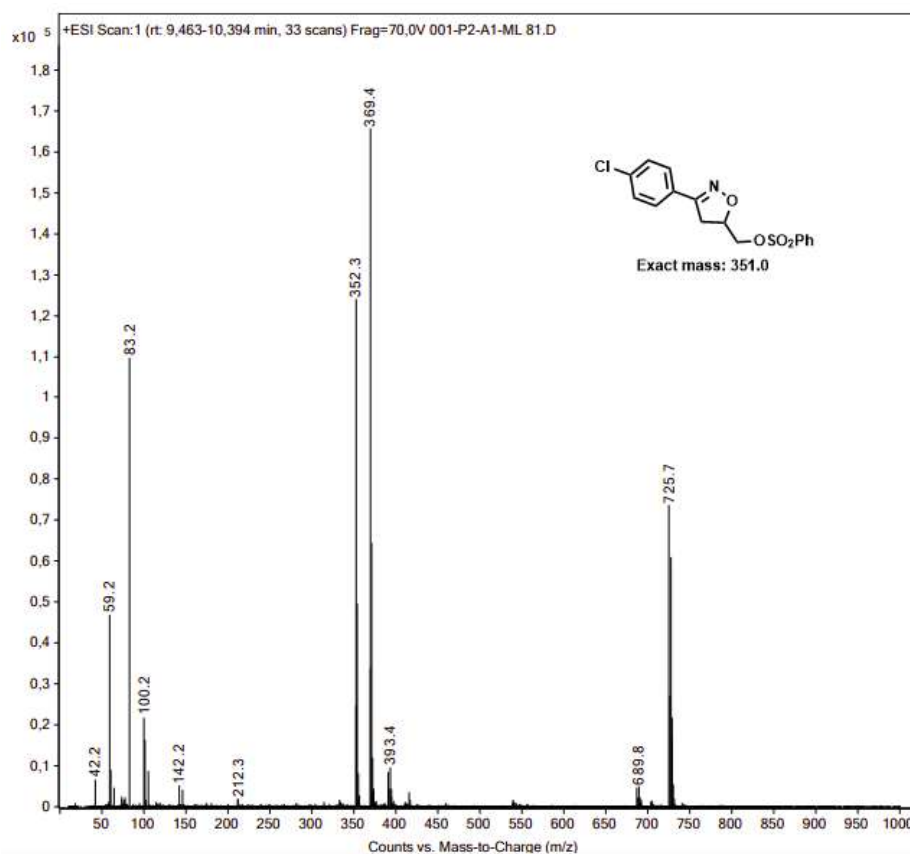

Figure S3. ESI<sup>+</sup>-MS spectrum of (5)

## 3. Copy of characteristic FT-IR spectra

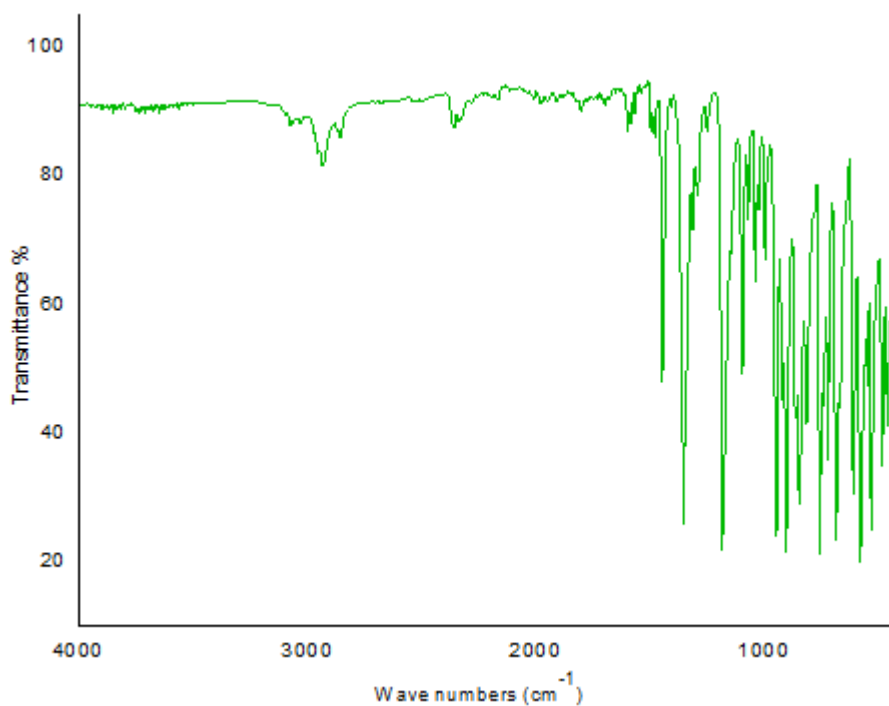

Figure S4. FT-IR spectrum of (5)
